# Supplementary material for: Combining next-generation sequencing and online databases for microsatellite development in non-model organisms
Source: PubMed Central journal article supplement — Sci Rep. 2013 Dec 3;3:3376. doi: 10.1038/srep03376 (PMC3847856; doi:10.1038/srep03376), 2013-12-03
Supplement: srep03376-s1.pdf [file srep03376-s1.pdf]

## Supplementary Information

### Combining next-generation sequencing and online databases for microsatellite development in non-model organisms

Ciro Rico<sup>1,2</sup>, Eric Normandeau<sup>3</sup>, Anne Marie Dion-Côté<sup>3</sup>, María Inés Rico<sup>3</sup>,  
Guillaume Côté<sup>3</sup> & Louis Bernatchez<sup>3</sup>

<sup>1</sup>Estación Biológica de Doñana, Consejo Superior de Investigaciones Científicas (EBD, CSIC), C/ Américo Vespucio s/n, 41092 Sevilla, Spain

<sup>2</sup>School of Marine Studies, University of the South Pacific, Lower Laucala Campus, Suva, Fiji Islands

<sup>3</sup>Institut de Biologie Intégrative et des Systèmes (IBIS), Département de Biologie, Université Laval, Pavillon Charles-Eugène-Marchand, Québec G1V 0A6, Canada.

Corresponding author:

Prof. C. Rico

School of Marine Studies

University of the South Pacific

Lower Laucala Campus, Suva, Fiji Islands.

Phone (+679) 323 2930

Fax: (+679) 323 1526

E-mail: [ciro@ebd.csic.es](mailto:ciro@ebd.csic.es)

Supplementary Table 1. Details of the 40 microsatellite markers developed or optimized for multiplex. Forty eight individuals of normal whitefish from all lakes (N=9 fish/lake and 3 positive controls) were used for this analyses. Locus identity, type of florescence dye in the forward primer, Panel numbers indicate loci sharing a multiplex in the PCR reaction, primer sequences, (O) primer orientation, (SSR) repeat motif, [C] primer concentrations in  $\mu\text{M}$  in the primer mix, ( $N_A$ ) number of alleles found in, ( $S_{FS}$ ) size in base pairs of the flanking sequences, range of allele sizes, ( $N_S$ ) number of repeated units in the smallest allele ( $N_L$ ) number of repeated units in the largest allele, ( $H_O$ ) observed and ( $H_E$ ) expected heterozygosities, (PIC) polymorphism information content, (NAF) null-allele frequency and GenBank accession numbers. Annealing temperatures for each panel were as follows: Kit 5= 61°C, Kit 3= 60°C, Kits 1,2,4 & 7= 58°C, Kits 6 & 8= 54°C.

| Locus ID     | Flouro | Panel | PCR Primers                                             | O | SSR  | [C] | $N_A$ | $S_{FS}$ | Range   | $N_S$ | $N_L$ | $H_O$ | $H_E$ | PIC   | NAF    | GenBank  |
|--------------|--------|-------|---------------------------------------------------------|---|------|-----|-------|----------|---------|-------|-------|-------|-------|-------|--------|----------|
| BWF-1‡       | 6-FAM  | 1     | GTACAGAGAAATACACACAACGCATCAA<br>CAGAGGTTCCACTTACTGAGCAC | F | (GT) | 5.0 | 8     | 165      | 207-225 | 21    | 30    | 0.519 | 0.549 | 0.491 | -0.015 | Ref 23   |
| Cocl-Lav18*  | VIC    | 1     | AACAACTAAAACATCCCAAGTC<br>TTAGATTGGGGCCTACCTTG          | F | (CT) | 5.0 | 4     | 127      | 149-159 | 11    | 16    | 0.392 | 0.364 | 0.314 | -0.036 | AY453203 |
| Cocl-Lav19*  | VIC    | 1     | TCACTGTACAACAGAATAGGGAAA<br>ATCCCTGATAAGCAGCCTCA        | F | (GT) | 2.5 | 6     | 226      | 256-266 | 15    | 20    | 0.247 | 0.259 | 0.293 | -0.088 | AY453204 |
| Cocl-Lav22*  | PET    | 1     | GAGAGGGGGTATGTCTGT<br>ATCGGAGTTTAGTAACCCAC              | F | (CA) | 1.2 | 13    | 105      | 105-139 | 0     | 17    | 0.594 | 0.568 | 0.499 | -0.125 | AY453205 |
| Cocl-Lav6*   | NED    | 1     | GCCATCATCCTCCCAGGAAAC<br>CAGGGAATCTGCACTGGAGC           | F | (CA) | 1.2 | 8     | 102      | 126-140 | 12    | 19    | 0.382 | 0.405 | 0.391 | -0.020 | AY453199 |
| Cocl-Lav32*  | VIC    | 2     | CCCCACGTCTCTCCCTTAAT<br>CGCTGTCAACTTTCCCTCTC            | F | (CT) | 3.0 | 12    | 188      | 248-270 | 30    | 41    | 0.320 | 0.319 | 0.300 | 0.014  | AY453209 |
| Cocl-Lav32a* | VIC    | 2     | CCCCACGTCTCTCCCTTAAT<br>CGCTGTCAACTTTCCCTCTC            | F | (CT) |     | 18    | 211      | 271-305 | 30    | 47    | 0.513 | 0.560 | 0.373 | -0.032 |          |
| Cocl-Lav49*  | PET    | 2     | AGCCAGTTGGAGGCTATTTG<br>AGGGCTGCTGTTGAAGTCAT            | F | (GT) | 2.0 | 21    | 157      | 173-249 | 8     | 46    | 0.368 | 0.378 | 0.290 | -0.039 | AY453212 |
| Osmo-5‡      | 6-FAM  | 2     | GTTGACTTAGATGATGGCTT<br>GGTATCAGTCTCAGTGGT              | F | (GT) | 2.0 | 15    | 136      | 152-188 | 8     | 26    | 0.592 | 0.571 | 0.515 | -0.037 | Ref 24   |
| Cisco-200‡   | 6-FAM  | 3     | GGTTAGGAGTTAGGGAAAATATG<br>GTTGTGAGGTAGGCCTGG           | F | (GT) | 5.0 | 21    | 222      | 240-282 | 9     | 30    | 0.714 | 0.779 | 0.819 | -0.052 | Ref 22   |

|              |       |   |                                                 |               |     |    |     |         |    |    |              |              |       |              |          |
|--------------|-------|---|-------------------------------------------------|---------------|-----|----|-----|---------|----|----|--------------|--------------|-------|--------------|----------|
| Cocl11       | NED   | 3 | CAATGACAATATGCACCCACA<br>CATCTCATCCCAGTCACTTCC  | F (GTT)<br>R  | 1.2 | 13 | 204 | 219-267 | 5  | 21 | 0.539        | 0.621        | 0.497 | 0.066        | KC172084 |
| Cocl11a      | NED   | 3 | CAATGACAATATGCACCCACA<br>CATCTCATCCCAGTCACTTCC  | F (GTT)<br>R  |     | 2  | 204 | 243-246 | 13 | 14 | 0.329        | 0.471        | 0.562 | 0.057        |          |
| Cocl15       | PET   | 3 | CAGATCAGTGGCTGTGGCTA<br>ACAACCCATTGATGCCAAGT    | F (GT)<br>R   | 5.0 | 9  | 220 | 246-274 | 13 | 27 | 0.637        | 0.599        | 0.471 | -0.104       | KC172087 |
| Cocl28§      | VIC   | 3 | TGTTTAGGGTTTTGATGATTGAA<br>ATCATGGCCGTTGCAGTAAT | F (AC)<br>R   | 1.2 | 8  | 213 | 221-241 | 4  | 14 | <b>0.337</b> | <b>0.600</b> | 0.600 | <b>0.269</b> | KC172092 |
| Cocl33       | 6-FAM | 3 | TGTTGCAGTGAGACAGGGTA<br>TTCACATGGTGTGCCAAAG     | F (GT)<br>R   | 2.5 | 11 | 101 | 123-151 | 11 | 25 | 0.647        | 0.671        | 0.532 | 0.131        | KC172096 |
| Cocl20       | 6-FAM | 4 | TCATCCCAGTCACTTCCACA<br>TTCAAATTCTGTGAATGGCATC  | F (CAA)<br>R  | 5.0 | 15 | 85  | 88-142  | 1  | 19 | 0.647        | 0.675        | 0.501 | -0.024       | KC172089 |
| Cocl32       | VIC   | 4 | GTCCATGCCTGGGAGTTCTA<br>GGTGCTCTGTCTCTCGCTTT    | F (GA)<br>R   | 3.0 | 25 | 267 | 287-343 | 10 | 38 | 0.841        | 0.835        | 0.879 | 0.027        | KC172095 |
| Cocl-Lav224* | 6-FAM | 4 | GTGGCAGGCAGCCATGAAG<br>GACGTTAGTCACTGCTTTCC     | F (CA)<br>R   | 3.5 | 21 | 174 | 206-246 | 6  | 26 | 0.617        | 0.643        | 0.688 | -0.073       | AY453224 |
| Cocl-Lav41*  | NED   | 4 | AAACAAACAGTGGTGGAGTGG<br>CAGCCAGCACTCTCATGCTTTT | F (GA)<br>R   | 3.0 | 19 | 128 | 186-226 | 29 | 49 | 0.655        | 0.720        | 0.568 | 0.065        | AY453210 |
| Cocl-Lav72*  | VIC   | 4 | CTCTCAAGATATCTAAGGAGG<br>CGGAGTTTAGTAACCACATTG  | F (TG)<br>R   | 2.0 | 13 | 130 | 152-180 | 11 | 25 | 0.470        | 0.560        | 0.408 | -0.037       | AY453217 |
| Cocl-Lav8*   | PET   | 4 | GCTGGAGCCACATGACATTA<br>ATGTTTTTCCATTGCCCAGA    | F (GT)<br>R   | 3.0 | 11 | 178 | 224-246 | 23 | 34 | 0.619        | 0.599        | 0.537 | -0.104       | AY453200 |
| Cocl13       | VIC   | 5 | GTTCGATGGTGTCTGAGCAA<br>AGAGCGCGAGACAGACAGAC    | F (CTGT)<br>R | 4.0 | 22 | 171 | 215-307 | 11 | 33 | 0.691        | 0.833        | 0.784 | 0.061        | KC172085 |
| Cocl14§      | 6-FAM | 5 | TATCCCAGATACGCCAAAGC<br>GCCTTTCCCAGTATCCTTCC    | F (AG)<br>R   | 4.0 | 9  | 351 | 363-383 | 6  | 16 | <b>0.115</b> | <b>0.321</b> | 0.492 | <b>0.756</b> | KC172086 |
| Cocl27       | 6-FAM | 5 | GACCACTGGCTTTTTCTTCG<br>ATAGCCAACATCCCACATCC    | F (GT)<br>R   | 1.5 | 5  | 256 | 282-292 | 13 | 18 | 0.316        | 0.302        | 0.122 | -0.028       | KC172091 |
| Cocl42       | 6-FAM | 5 | GGGGAGGGATATTGACCCTA<br>CTCCTAATAACACACGCACACA  | F (GT)<br>R   | 4.0 | 4  | 145 | 175-181 | 15 | 18 | 0.883        | 0.541        | 0.418 | -0.213       | KC172102 |
| Cocl44       | 6-FAM | 5 | CAAAGGCTTCGGCTTTGTTA<br>CCCTCTATCCACCCCACTCT    | F (AG)<br>R   | 1.5 | 5  | 144 | 150-162 | 3  | 9  | 0.674        | 0.526        | 0.500 | -0.148       | KC172103 |
| Cocl24       | 6-FAM | 6 | TTCTTGCCACCTTGTCTCT<br>CTCCTCTTTTCCCCCTTTTG     | F (CA)<br>R   | 2.5 | 8  | 238 | 256-272 | 9  | 17 | 0.320        | 0.354        | 0.441 | 0.085        | KC172090 |
| Cocl29       | 6-FAM | 6 | AAAAAGGCCACATCGGTATT<br>GGGTCCGTACGAGGTACTTG    | F (GA)<br>R   | 2.0 | 4  | 294 | 312-320 | 9  | 13 | 0.053        | 0.056        | 0.073 | -0.011       | KC172093 |
| Cocl34       | NED   | 6 | AAACAGCACTCTACCACCAGTTT<br>GCGGATGCTTCGTAACAGAT | F (CT)<br>R   | 3.0 | 17 | 175 | 207-245 | 16 | 35 | 0.656        | 0.642        | 0.580 | -0.034       | KC172097 |

|            |       |   |                                                      |             |     |    |     |         |    |    |       |       |       |        |          |
|------------|-------|---|------------------------------------------------------|-------------|-----|----|-----|---------|----|----|-------|-------|-------|--------|----------|
| Sfo-8-1‡   | PET   | 6 | CAACGAGCACAGAACAGG<br>CTTCCCCTGGAGAGGAAA             | F (GT)<br>R | 2.5 | 8  | 141 | 173-189 | 16 | 24 | 0.149 | 0.147 | 0.422 | -0.072 | Ref 25   |
| Sfo-8-2‡   | PET   | 6 | CAACGAGCACAGAACAGG<br>CTTCCCCTGGAGAGGAAA             | F (GT)<br>R | 5   |    | 184 | 214-222 | 15 | 19 | 0.321 | 0.396 | 0.395 | -0.078 |          |
| Cocl30     | 6-FAM | 7 | CGCAACTCCATCCGTAATCT<br>TGTGGTGACATGGATTTCGT         | F (GA)<br>R | 3.0 | 8  | 322 | 334-354 | 6  | 16 | 0.117 | 0.126 | 0.038 | -0.003 | KC172094 |
| Cocl36     | NED   | 7 | AAACCCCGGGAGTCATTATC<br>CTGTGTTGGGTGGGTCTTTG         | F (AC)<br>R | 2.0 | 15 | 87  | 101-147 | 7  | 30 | 0.562 | 0.580 | 0.369 | 0.000  | KC172098 |
| Cocl37     | PET   | 7 | TTCCAGGGATAAGTGGCTTG<br>AACGGAGGCAAGGTGTGTAT         | F (CT)<br>R | 2.0 | 7  | 184 | 208-220 | 12 | 18 | 0.483 | 0.466 | 0.515 | 0.037  | KC172099 |
| Cocl40     | 6-FAM | 7 | CAGCAACAGACGGGTGACTA<br>GGAATGGAACGTCGAGTGAT         | F (GT)<br>R | 2.0 | 6  | 216 | 232-244 | 8  | 14 | 0.157 | 0.210 | 0.369 | 0.134  | KC172101 |
| Cocl5      | 6-FAM | 7 | TCTGTCCCAAGAGGTAGATTCC<br>AGGAGAGAGGGTGGGATGAG       | F (CT)<br>R | 1.5 | 6  | 80  | 240-255 | 5  | 12 | 0.359 | 0.367 | 0.350 | -0.097 | KC172082 |
| Cocl-Lav4* | 6-FAM | 7 | TGGTGTAAATGGCTTTTCCTG<br>GGGAGCAACATTGGACTCTC        | F (GT)<br>R | 1.5 | 7  | 123 | 143-155 | 11 | 16 | 0.425 | 0.441 | 0.336 | -0.054 | AY453197 |
| Cocl17     | 6-FAM | 8 | CAGGAAACTGTGGAGAAGATGA<br>AGGTACACACAATTCAACTAGTCTCC | F (GA)<br>R | 3.3 | 7  | 241 | 273-299 | 16 | 29 | 0.524 | 0.485 | 0.438 | -0.024 | KC172088 |
| Cocl39     | 6-FAM | 8 | AAGGGCTCTCCATCTGAACA<br>GTTGCCGTGGTAGCGACTAT         | F (GT)<br>R | 1.8 | 6  | 203 | 215-229 | 6  | 13 | 0.344 | 0.437 | 0.175 | 0.054  | KC172100 |
| Cocl8      | 6-FAM | 8 | TGTCGCACTACTGCTGAAGA<br>TTTTTCGTTTTGGCAATAGGT        | F (CA)<br>R | 3.3 | 2  | 183 | 201-203 | 9  | 10 | 0.243 | 0.256 | 0.224 | 0.008  | KC172083 |

§ Denotes loci with significant heterozygous deficit.

\* Denotes loci previously developed in whitefish<sup>21</sup>

‡ Denotes loci previously developed in other salmonidae species<sup>22-25</sup>

Supplementary Table 2. Genetic diversity at 494 lake whitefish. Observed ( $H_O$ ) and expected heterozygosities ( $H_E$ ) and number (N) of genotyped dwarf and normal whitefish from lakes Webster, Témiscouata, East and Cliff and Indian pond from the Saint-John River Basin. Values in bold and italic denote significant deviations from Hardy-Weinberg equilibrium ( $P < 0.05$ ). The maximum number of missing data was set at 5%.

| Locus ID  | D_Webster |             |             | N_Webster |             |             | D_Témiscouata |             |             | N_Témiscouata |             |             | D_East |             |             |
|-----------|-----------|-------------|-------------|-----------|-------------|-------------|---------------|-------------|-------------|---------------|-------------|-------------|--------|-------------|-------------|
|           | N         | $H_O$       | $H_E$       | N         | $H_O$       | $H_E$       | N             | $H_O$       | $H_E$       | N             | $H_O$       | $H_E$       | N      | $H_O$       | $H_E$       |
| CoclAV6   | 46        | <b>0.46</b> | <b>0.52</b> | 51        | 0.43        | 0.43        | 81            | 0.58        | 0.58        | 42            | 0.64        | 0.60        | 57     | 0.35        | 0.35        |
| CoclAV8   | 46        | 0.63        | 0.62        | 51        | 0.75        | 0.62        | 81            | 0.48        | 0.55        | 42            | 0.48        | 0.49        | 58     | 0.59        | 0.52        |
| Cocl11    | 45        | 0.62        | 0.70        | 51        | 0.47        | 0.54        | 82            | <b>0.60</b> | <b>0.79</b> | 38            | 0.71        | 0.77        | 58     | 0.66        | 0.72        |
| Cocl13    | 46        | 0.80        | 0.90        | 50        | 0.70        | 0.81        | 82            | 0.72        | 0.82        | 42            | 0.69        | 0.83        | 58     | <b>0.86</b> | <b>0.91</b> |
| Cocl14    | 46        | <b>0.17</b> | <b>0.38</b> | 49        | <b>0.08</b> | <b>0.58</b> | 81            | 0           | 0           | 42            | 0           | 0           | 58     | <b>0.40</b> | <b>0.56</b> |
| Cocl15    | 46        | 0.78        | 0.67        | 51        | 0.67        | 0.56        | 81            | 0.67        | 0.63        | 42            | 0.62        | 0.62        | 58     | 0.57        | 0.52        |
| CoclAV18  | 46        | 0.28        | 0.27        | 51        | 0.39        | 0.36        | 82            | 0.06        | 0.06        | 42            | 0.10        | 0.09        | 58     | 0.09        | 0.08        |
| CoclAV19  | 46        | 0.26        | 0.24        | 51        | 0.35        | 0.31        | 82            | 0.32        | 0.31        | 42            | 0.19        | 0.20        | 58     | 0.22        | 0.21        |
| Cocl20    | 46        | 0.83        | 0.79        | 51        | 0.57        | 0.54        | 80            | 0.83        | 0.82        | 41            | 0.80        | 0.78        | 58     | 0.83        | 0.76        |
| CoclAV22  | 46        | 0.76        | 0.61        | 51        | 0.67        | 0.56        | 82            | 0.55        | 0.48        | 42            | 0.52        | 0.57        | 58     | 0.50        | 0.48        |
| Cocl27    | 46        | 0.17        | 0.16        | 50        | 0.14        | 0.13        | 81            | 0.30        | 0.29        | 42            | <b>0.29</b> | <b>0.41</b> | 58     | 0.10        | 0.10        |
| Cocl28    | 46        | <b>0.48</b> | <b>0.63</b> | 51        | 0.37        | 0.67        | 82            | 0.44        | 0.74        | 42            | <b>0.33</b> | <b>0.77</b> | 58     | <b>0.33</b> | <b>0.61</b> |
| CoclAV32  | 46        | 0.63        | 0.70        | 50        | 0.32        | 0.32        | 81            | 0.77        | 0.75        | 41            | 0.76        | 0.76        | 57     | 0.67        | 0.76        |
| Cocl32    | 46        | 0.93        | 0.91        | 51        | 0.84        | 0.90        | 80            | 0.79        | 0.84        | 39            | 0.79        | 0.81        | 57     | 0.89        | 0.89        |
| Cocl33    | 46        | 0.72        | 0.74        | 51        | 0.47        | 0.61        | 82            | 0.80        | 0.70        | 38            | 0.71        | 0.71        | 56     | 0.66        | 0.71        |
| CoclLav41 | 46        | 0.70        | 0.75        | 51        | 0.55        | 0.63        | 82            | 0.70        | 0.81        | 42            | 0.88        | 0.81        | 58     | 0.69        | 0.83        |
| Cocl42    | 46        | 0.52        | 0.43        | 51        | 0.78        | 0.52        | 82            | 0.29        | 0.28        | 42            | 0.38        | 0.39        | 58     | 0.29        | 0.28        |
| Cocl44    | 46        | 0.65        | 0.52        | 51        | 0.73        | 0.57        | 82            | 0.67        | 0.59        | 42            | 0.50        | 0.51        | 58     | 0.67        | 0.54        |
| Cocl32a   | 44        | 0.64        | 0.62        | 50        | 0.56        | 0.63        | 82            | 0.67        | 0.72        | 38            | <b>0.58</b> | <b>0.77</b> | 58     | 0.66        | 0.74        |
| Cocl11a   | 46        | 0.39        | 0.50        | 51        | 0.53        | 0.50        | 81            | 0.43        | 0.44        | 39            | 0.31        | 0.47        | 57     | 0.35        | 0.50        |
| CoclAV49  | 46        | 0.57        | 0.59        | 51        | 0.33        | 0.31        | 81            | 0.35        | 0.34        | 37            | 0.41        | 0.41        | 55     | 0.18        | 0.19        |
| CoclAV72  | 46        | 0.46        | 0.51        | 51        | 0.47        | 0.45        | 78            | 0.46        | 0.48        | 42            | 0.45        | 0.55        | 58     | <b>0.33</b> | <b>0.55</b> |
| CoclAV224 | 46        | 0.74        | 0.72        | 51        | 0.84        | 0.74        | 82            | 0.65        | 0.72        | 42            | 0.67        | 0.76        | 58     | 0.67        | 0.70        |
| BWF-1     | 46        | 0.61        | 0.65        | 51        | 0.59        | 0.58        | 80            | 0.51        | 0.59        | 42            | 0.43        | 0.59        | 58     | 0.45        | 0.52        |
| Cisco-200 | 46        | 0.83        | 0.83        | 51        | 0.92        | 0.85        | 82            | 0.72        | 0.84        | 42            | 0.88        | 0.82        | 58     | <b>0.45</b> | <b>0.82</b> |
| Osmo-5    | 46        | 0.46        | 0.41        | 51        | 0.57        | 0.55        | 82            | 0.73        | 0.70        | 42            | 0.62        | 0.59        | 58     | 0.78        | 0.76        |
| Cocl4     | 46        | 0.57        | 0.50        | 51        | 0.43        | 0.39        | 82            | 0.43        | 0.48        | 42            | 0.40        | 0.53        | 58     | 0.43        | 0.44        |
| Cocl5     | 46        | 0.30        | 0.32        | 51        | 0.51        | 0.43        | 81            | 0.54        | 0.48        | 38            | 0.58        | 0.47        | 58     | 0.38        | 0.36        |
| Cocl17    | 46        | 0.74        | 0.52        | 51        | 0.57        | 0.54        | 78            | <b>0.22</b> | <b>0.71</b> | 42            | 0.31        | 0.38        | 57     | 0.63        | 0.46        |
| Cocl24    | 46        | 0.48        | 0.43        | 51        | 0.45        | 0.55        | 82            | 0.34        | 0.37        | 40            | 0.33        | 0.36        | 55     | 0.25        | 0.26        |
| Cocl29    | 46        | 0.04        | 0.04        | 51        | 0.08        | 0.08        | 82            | 0.16        | 0.19        | 40            | 0.03        | 0.03        | 55     | 0.18        | 0.19        |
| Cocl30    | 46        | 0.13        | 0.12        | 51        | 0.04        | 0.04        | 82            | 0.09        | 0.08        | 42            | 0.07        | 0.12        | 58     | 0.28        | 0.27        |
| Cocl34    | 46        | 0.72        | 0.73        | 51        | 0.69        | 0.65        | 81            | 0.65        | 0.65        | 40            | 0.65        | 0.71        | 55     | 0.84        | 0.80        |
| Cocl36    | 46        | 0.61        | 0.60        | 50        | 0.40        | 0.41        | 78            | <b>0.68</b> | <b>0.74</b> | 39            | 0.72        | 0.73        | 58     | 0.79        | 0.67        |
| Cocl37    | 46        | 0.54        | 0.54        | 50        | 0.54        | 0.58        | 78            | 0.28        | 0.27        | 38            | 0.37        | 0.38        | 58     | 0.52        | 0.53        |
| Cocl39    | 45        | 0.18        | 0.27        | 46        | 0.17        | 0.20        | 80            | 0.54        | 0.51        | 42            | 0.52        | 0.53        | 57     | 0.35        | 0.34        |
| Cocl40    | 46        | 0.22        | 0.32        | 51        | 0.37        | 0.49        | 79            | 0.10        | 0.10        | 41            | 0.10        | 0.09        | 58     | 0.22        | 0.21        |
| Sfo-1-8   | 46        | 0.30        | 0.32        | 51        | 0.53        | 0.48        | 82            | 0.02        | 0.02        | 40            | 0.13        | 0.12        | 55     | 0.05        | 0.05        |
| Sfo-1-2   | 46        | 0.37        | 0.51        | 51        | 0.59        | 0.51        | 82            | 0.33        | 0.40        | 41            | 0.32        | 0.31        | 56     | 0.25        | 0.45        |
| $\bar{x}$ | 45,9      | 0,52        | 0,53        | 50,67     | 0,50        | 0,50        | 80,9          | 0,47        | 0,51        | 40,82         | 0,47        | 0,51        | 57,36  | 0,47        | 0,50        |
| $\sigma$  | 0,38      | 0,23        | 0,21        | 0,90      | 0,21        | 0,19        | 1,59          | 0,24        | 0,25        | 1,60          | 0,24        | 0,25        | 1,06   | 0,24        | 0,24        |

| Locus ID   | N_East |                |                | D_Indian |                |                | N_Indian |                |                | D_Cliff |                |                | N_Cliff |                |                |
|------------|--------|----------------|----------------|----------|----------------|----------------|----------|----------------|----------------|---------|----------------|----------------|---------|----------------|----------------|
|            | N      | H <sub>O</sub> | H <sub>E</sub> | N        | H <sub>O</sub> | H <sub>E</sub> | N        | H <sub>O</sub> | H <sub>E</sub> | N       | H <sub>O</sub> | H <sub>E</sub> | N       | H <sub>O</sub> | H <sub>E</sub> |
| CoclLAV6   | 44     | 0.32           | 0.33           | 38       | 0.24           | 0.22           | 40       | 0.18           | 0.16           | 47      | 0.45           | 0.52           | 49      | 0.29           | 0.37           |
| CoclLAV8   | 44     | 0.86           | 0.74           | 38       | 0.61           | 0.58           | 40       | 0.60           | 0.49           | 47      | 0.62           | 0.65           | 48      | 0.56           | 0.66           |
| Cocl11     | 43     | 0.44           | 0.54           | 38       | 0.61           | 0.76           | 40       | 0.68           | 0.54           | 47      | 0.53           | 0.78           | 50      | 0.08           | 0.08           |
| Cocl13     | 44     | 0.61           | 0.84           | 36       | 0.58           | 0.88           | 40       | 0.53           | 0.73           | 47      | 0.70           | 0.87           | 50      | 0.56           | 0.62           |
| Cocl14     | 43     | <b>0.09</b>    | <b>0.31</b>    | 38       | <b>0.08</b>    | <b>0.34</b>    | 39       | <b>0.10</b>    | <b>0.23</b>    | 45      | <b>0.16</b>    | <b>0.33</b>    | 49      | <b>0.04</b>    | <b>0.50</b>    |
| Cocl15     | 44     | 0.52           | 0.51           | 38       | 0.68           | 0.63           | 40       | 0.63           | 0.64           | 47      | 0.74           | 0.68           | 48      | 0.58           | 0.54           |
| CoclLAV18  | 44     | 0.09           | 0.09           | 38       | 0.03           | 0.03           | 40       | 0.05           | 0.05           | 47      | 0              | 0              | 49      | 0.24           | 0.25           |
| CoclLAV19  | 44     | 0.27           | 0.29           | 38       | 0.18           | 0.24           | 40       | 0.03           | 0.07           | 47      | 0.40           | 0.45           | 49      | 0.22           | 0.20           |
| Cocl20     | 44     | 0.64           | 0.65           | 38       | 0.63           | 0.77           | 40       | 0.55           | 0.52           | 47      | 0.70           | 0.80           | 50      | 0.18           | 0.28           |
| CoclLAV22  | 44     | 0.52           | 0.52           | 38       | 0.76           | 0.60           | 39       | 0.74           | 0.55           | 47      | 0.49           | 0.69           | 47      | 0.47           | 0.61           |
| Cocl27     | 44     | 0.14           | 0.17           | 38       | 0.50           | 0.49           | 40       | 0.43           | 0.37           | 47      | 0.51           | 0.45           | 48      | 0.44           | 0.35           |
| Cocl28     | 44     | <b>0.14</b>    | <b>0.61</b>    | 38       | <b>0.24</b>    | <b>0.51</b>    | 39       | <b>0.26</b>    | <b>0.56</b>    | 47      | 0.26           | 0.31           | 49      | <b>0.43</b>    | <b>0.57</b>    |
| CoclLAV32  | 44     | 0.59           | 0.58           | 38       | 0.66           | 0.73           | 40       | 0.15           | 0.27           | 47      | 0.74           | 0.72           | 47      | 0.62           | 0.62           |
| Cocl32     | 43     | 0.86           | 0.80           | 38       | 0.97           | 0.91           | 40       | 0.93           | 0.85           | 47      | 0.68           | 0.82           | 49      | 0.73           | 0.63           |
| Cocl33     | 44     | 0.68           | 0.75           | 38       | 0.71           | 0.73           | 40       | 0.50           | 0.69           | 47      | 0.62           | 0.61           | 50      | 0.54           | 0.45           |
| CoclLav41  | 44     | 0.68           | 0.81           | 38       | 0.82           | 0.85           | 40       | 0.48           | 0.49           | 47      | 0.72           | 0.76           | 48      | 0.38           | 0.43           |
| Cocl42     | 44     | 0.57           | 0.43           | 38       | 0.34           | 0.29           | 39       | 0.28           | 0.32           | 47      | 0.11           | 0.10           | 50      | 0.82           | 0.50           |
| Cocl44     | 44     | 0.73           | 0.54           | 38       | 0.55           | 0.44           | 40       | 0.93           | 0.55           | 47      | 0.70           | 0.57           | 49      | 0.39           | 0.32           |
| Cocl32a    | 44     | 0.32           | 0.41           | 38       | 0.50           | 0.52           | 40       | 0.40           | 0.38           | 47      | 0.81           | 0.78           | 50      | 0.14           | 0.13           |
| Cocl11a    | 44     | <b>0.09</b>    | <b>0.51</b>    | 38       | 0.11           | 0.46           | 40       | 0.30           | 0.46           | 47      | 0.34           | 0.47           | 50      | 0.36           | 0.45           |
| CoclLAV49  | 44     | 0.30           | 0.27           | 38       | 0.63           | 0.54           | 40       | 0.15           | 0.23           | 47      | 0.62           | 0.73           | 48      | 0.08           | 0.08           |
| CoclLAV72  | 44     | 0.25           | 0.43           | 38       | 0.58           | 0.69           | 39       | 0.36           | 0.50           | 47      | 0.51           | 0.65           | 50      | 0.78           | 0.74           |
| CoclLAV224 | 44     | 0.48           | 0.49           | 38       | 0.53           | 0.56           | 40       | 0.63           | 0.66           | 47      | 0.47           | 0.42           | 46      | 0.52           | 0.57           |
| BWF-1      | 44     | 0.55           | 0.62           | 38       | 0.68           | 0.69           | 40       | 0.83           | 0.67           | 46      | 0.54           | 0.56           | 46      | 0.02           | 0.02           |
| Cisco-200  | 44     | 0.82           | 0.83           | 38       | 0.82           | 0.82           | 38       | 0.76           | 0.81           | 47      | 0.55           | 0.74           | 48      | 0.56           | 0.49           |
| Osmo-5     | 44     | 0.82           | 0.75           | 38       | 0.45           | 0.50           | 40       | 0.23           | 0.21           | 47      | 0.68           | 0.71           | 48      | 0.50           | 0.47           |
| Cocl4      | 44     | 0.34           | 0.40           | 38       | 0.47           | 0.49           | 40       | 0.60           | 0.44           | 47      | 0.36           | 0.34           | 48      | 0.35           | 0.44           |
| Cocl5      | 44     | 0.25           | 0.22           | 38       | 0.29           | 0.35           | 40       | 0.18           | 0.39           | 47      | 0.51           | 0.61           | 50      | 0.06           | 0.06           |
| Cocl17     | 44     | 0.64           | 0.47           | 35       | 0.34           | 0.36           | 40       | 0.28           | 0.24           | 45      | 0.84           | 0.61           | 47      | 0.57           | 0.41           |
| Cocl24     | 43     | 0.37           | 0.41           | 36       | 0.22           | 0.23           | 40       | 0.55           | 0.67           | 47      | 0.13           | 0.12           | 50      | 0.14           | 0.13           |
| Cocl29     | 43     | 0.02           | 0.02           | 36       | 0              | 0              | 40       | 0              | 0              | 47      | 0.02           | 0.02           | 50      | 0              | 0              |
| Cocl30     | 44     | 0.11           | 0.11           | 38       | 0.18           | 0.17           | 38       | 0.16           | 0.20           | 47      | 0.09           | 0.08           | 50      | 0.04           | 0.04           |
| Cocl34     | 43     | 0.65           | 0.65           | 35       | 0.80           | 0.78           | 40       | 0.45           | 0.38           | 47      | 0.79           | 0.70           | 50      | 0.34           | 0.39           |
| Cocl36     | 43     | 0.63           | 0.65           | 37       | 0.70           | 0.80           | 40       | 0.38           | 0.41           | 47      | 0.66           | 0.65           | 46      | 0.11           | 0.11           |
| Cocl37     | 44     | 0.30           | 0.32           | 37       | 0.59           | 0.56           | 40       | 0.80           | 0.65           | 47      | 0.47           | 0.41           | 48      | 0.48           | 0.51           |
| Cocl39     | 44     | 0.36           | 0.55           | 34       | 0.35           | 0.59           | 40       | 0.23           | 0.50           | 45      | 0.24           | 0.32           | 49      | 0.33           | 0.50           |
| Cocl40     | 44     | 0.09           | 0.09           | 38       | 0.26           | 0.23           | 40       | 0.08           | 0.07           | 47      | 0.02           | 0.02           | 47      | 0.13           | 0.50           |
| Sfo-1-8    | 43     | 0.12           | 0.11           | 36       | 0.19           | 0.18           | 40       | 0.10           | 0.14           | 47      | 0.06           | 0.06           | 48      | 0              | 0              |
| Sfo-1-2    | 42     | <b>0.05</b>    | <b>0.39</b>    | 35       | 0.34           | 0.50           | 40       | 0.43           | 0.43           | 47      | 0.06           | 0.06           | 50      | 0.24           | 0.30           |
| $\bar{x}$  | 43,7   | 0,42           | 0,47           | 37,4     | 0,47           | 0,51           | 39,8     | 0,41           | 0,42           | 46,8    | 0,46           | 0,49           | 48,7    | 0,34           | 0,37           |
| $\sigma$   | 0,50   | 0,26           | 0,23           | 1,12     | 0,25           | 0,25           | 0,54     | 0,26           | 0,22           | 0,56    | 0,26           | 0,27           | 1,28    | 0,23           | 0,21           |

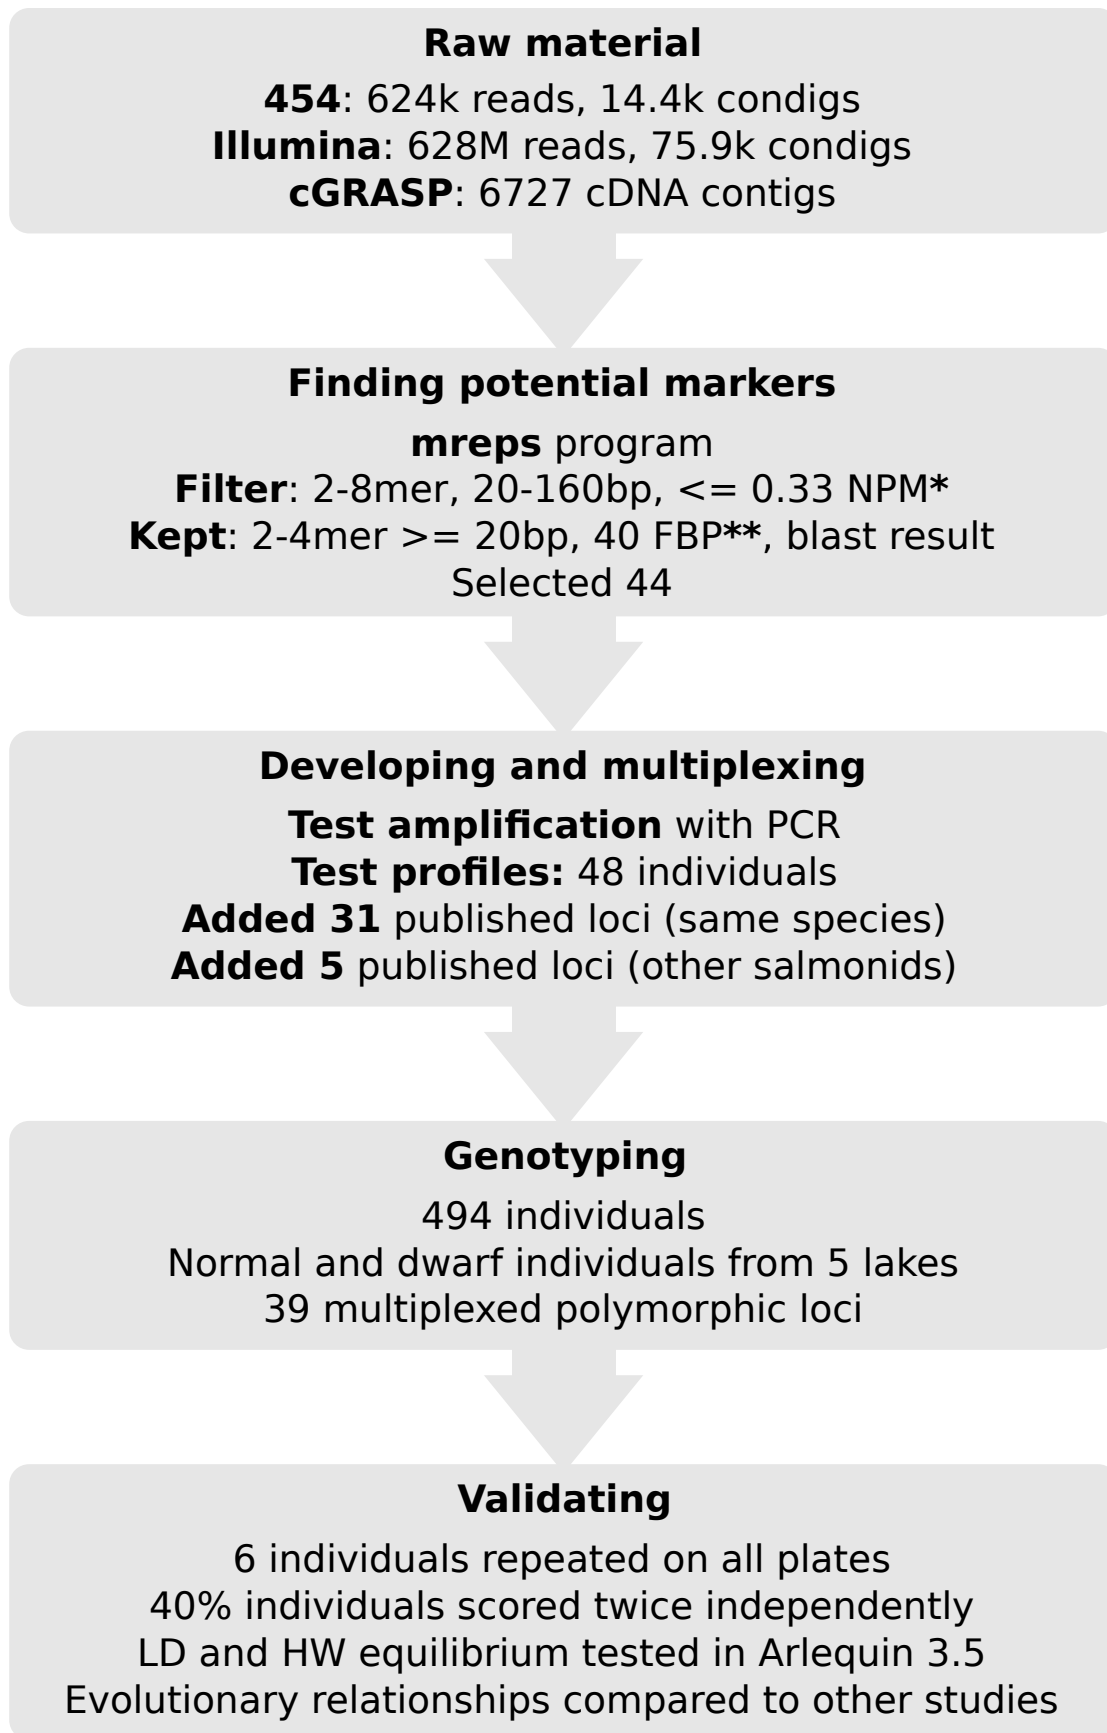

\* **Non-perfect matches**

\*\* **Flanking base pairs**

**Supplementary Figure 1.** Flowchart of the procedures followed to identify and validate the microsatellite loci used in this study
